# Supplementary material for: Dynamic high-sensitivity troponin elevations in atrial fibrillation patients might not be associated with significant coronary artery disease
Source: BMC Cardiovasc Disord. 2017 Jun 27;17:169. doi: 10.1186/s12872-017-0601-7 (PMC5488365; doi:10.1186/s12872-017-0601-7)
Supplement: Supplementary file 1 — Baseline characteristics, presentation and outcomes in the study population with CAD according to troponin subgroups. (XLSX 38 kb) [file 12872_2017_601_MOESM1_ESM.xlsx]

## Sheet: Sheet1
Supplementary Table 1. Baseline characteristics, presentation and outcomes in the study population with CAD according
to troponin subgroups
	Normal hsTnT (n=26)	Elevated hsTnT (n=42)	Dynamic hsTnT (n=17)	p-valuea
Age (years)	70 (65-78)	82 (75-86)	75 (70-84)	0.04
Male sex	14 (54%)	21 (50%)	11 (65%)	0.54
Current smoking	3 (12%)	4 (10%)	1 (6.3%)	0.49
Hypertension	15 (58%)	23 (55%)	5 (29%)	0.12
Hyperlipidemia	23 (89%)	32 (76%)	12 (71%)	0.14
Diabetes	5 (19%)	7 (17%)	2 (12%)	0.42
Prior stroke/TIA	4 (15%)	7 (17%)	2 (12%)	0.56
Prior AF/atrial flutter	20 (77%)	26 (62%)	9 (53%)	0.18
CHA2DS2VASc
≤1	0	0	1 (5.9%)	0.40
2	9 (35%)	6 (14%)	4 (24%)	0.44
3	4 (15%)	8 (19%)	4 (24%)	0.69
4	5 (19%)	12 (29%)	5 (29%)	0.48
≥5	8 (31%)	16 (38%)	3 (18%)	0.48
Systolic BP (mmHg)	136 (122-162)	140 (125-156)	136 (106-148)	0.33
Heart rate (beats/min)	128 (119-135)	135 (120-144)	140 (133-154)	0.003
Hemoglobin (g/L)	145 (134-157)	133 (123-147)	135 (119-152)	0.11
Creatinine (μg/L)	93 (80-104)	97 (87-125)	91 (69-111)	0.41
CRP (mg/L)	1.6 (0.58-4.6)	9.3 (3.0-30)	2.7 (1.9-6.1)	0.04
Peak hsTnT (ng/L)	7 (4-9)	33 (21-47)	54 (24-86)	<0.001
Chest pain	8 (31%)	16 (38%)	14 (82%)	0.002
ST depression	4 (15%)	15 (36%)	5 (29%)	0.23
Atrial fibrillation	18 (69%)	37 (88%)	14 (82%)	0.28
CVD death	0	9 (21%)	2 (12%)	0.15
All cause mortality	2 (7.7%)	15 (36%)	5 (29%)	0.07
Primary endpoint	0	7 (16.7%)	7 (41%)	0.001
Data are presented as n (%) of patients or median and 25th-75th interquartile range for continous variables. Variables are defined in methods.
CAD coronary artery disease, hsTnT high sensitivity troponin T, TIA transient ischemic attack, AF atrial fibrillation, BP blood pressure,
CVD cardiovascular death.
a normal hsTnT compared to dynamic hsTnT
